# Supplementary material for: The Evolutionary Conserved Transmembrane BAX Inhibitor Motif (TMBIM) Containing Protein Family is Essential for the Development and Survival of Drosophila Melanogaster
Source: Research Square preprint supplement (doi:10.21203/rs.3.rs-113374/v1), 2020-12-03

**The evolutionary conserved transmembrane BAX inhibitor motif (TMBIM) containing protein family is essential for the development and survival of *Drosophila Melanogaster***

Li Zhang1,2, Sebastian Buhr1,2, Vibha Prasad3, Aaron Voigt3,4*, and Axel Methner1*#

1Johannes Gutenberg University Medical Center Mainz, Institute for Molecular Medicine, Langenbeckstr. 1, D-55131 Mainz, Germany.

2Institute of Developmental Biology and Neurobiology (iDN), Johannes Gutenberg University Mainz, Biozentrum 1, Hanns-Dieter-Hüsch-Weg 15, D-55128 Mainz, Germany

3Department of Neurology, RWTH University Aachen, Pauwelsstr. 30, D-52074 Aachen, Germany.

4JARA-Institute Molecular Neuroscience and Neuroimaging, Forschungszentrum Jülich GmbH and RWTH Aachen University, Pauwelsstraße 30, 52074 Aachen, Germany.

Running title: Characterization of the TMBIM family in Drosophila melanogaster

# Correspondence should be addressed to: Axel Methner MD, Johannes Gutenberg University Medical Center Mainz, Institute for Molecular Medicine, Langenbeckstraße 1, D-55131 Mainz, Germany, Tel.: +49-6131-17-2695, Fax: +49-6131-17-5967, Email: axel.methner@gmail.com

* Equally contributed

Original gel of Figure S1C


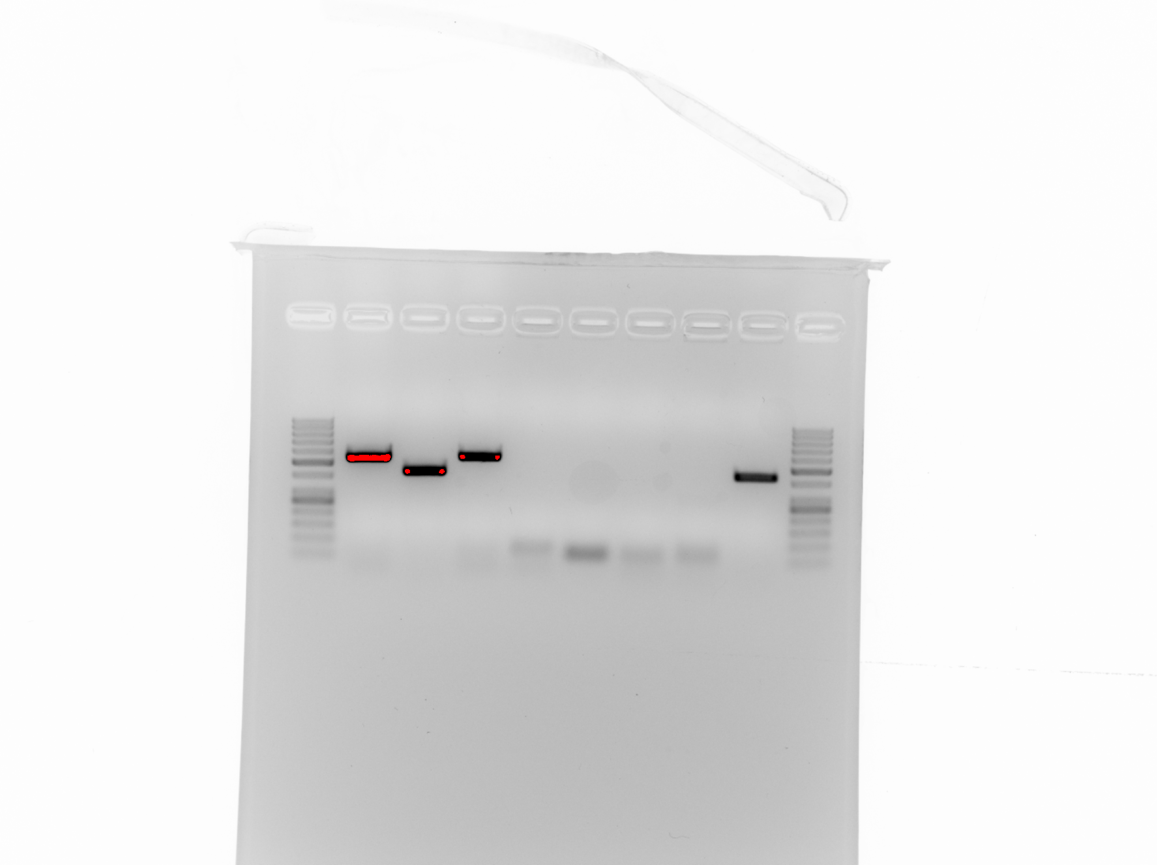

Supplement: Supplementary file 2 [file 1ea08c590c3d0c346ff8a31b.docx]
